# Supplementary material for: “Non-Toxic” Proteins of the Botulinum Toxin Complex Exert In-vivo Toxicity
Source: PubMed Central journal article supplement (PMC4978960; doi:10.1038/srep31043), 2016-08-10
Supplement: srep31043-s1.pdf [file srep31043-s1.pdf]

**“Non-Toxic” Proteins of the Botulinum Toxin Complex Exert *In-vivo*  
Toxicity**

Shin-Ichiro Miyashita,<sup>1</sup> Yoshimasa Sagane <sup>1\*</sup>, Tomonori Suzuki,<sup>2</sup> Takashi Matsumoto,<sup>3</sup> Koichi

Niwa,<sup>1</sup> and Toshihiro Watanabe<sup>1</sup>

<sup>1</sup> *Department of Food and Cosmetic Science, Faculty of Bioindustry, Tokyo University of*

*Agriculture, 196 Yasaka, Abashiri 099-2493, Japan*

<sup>2</sup> *Department of Nutritional Science and Food Safety, Faculty of Applied Bioscience, Tokyo*

*University of Agriculture, 1-1-1 Sakuragaoka, Setagaya-ku, Tokyo 156-8502, Japan*

<sup>3</sup> *Rigaku Corporation, 3-9-12 Matsubara-Cho, Akishima 196-8666, Japan*

## Supplementary information

### Supplementary figure 1

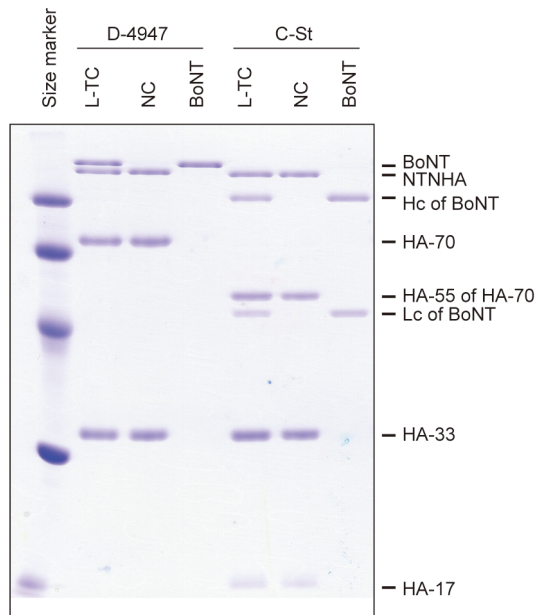

**Figure S1.** SDS-PAGE banding profiles of the purified L-TC, “Non Toxic” complex and BoNT

used in this study.

Supplementary figure 2

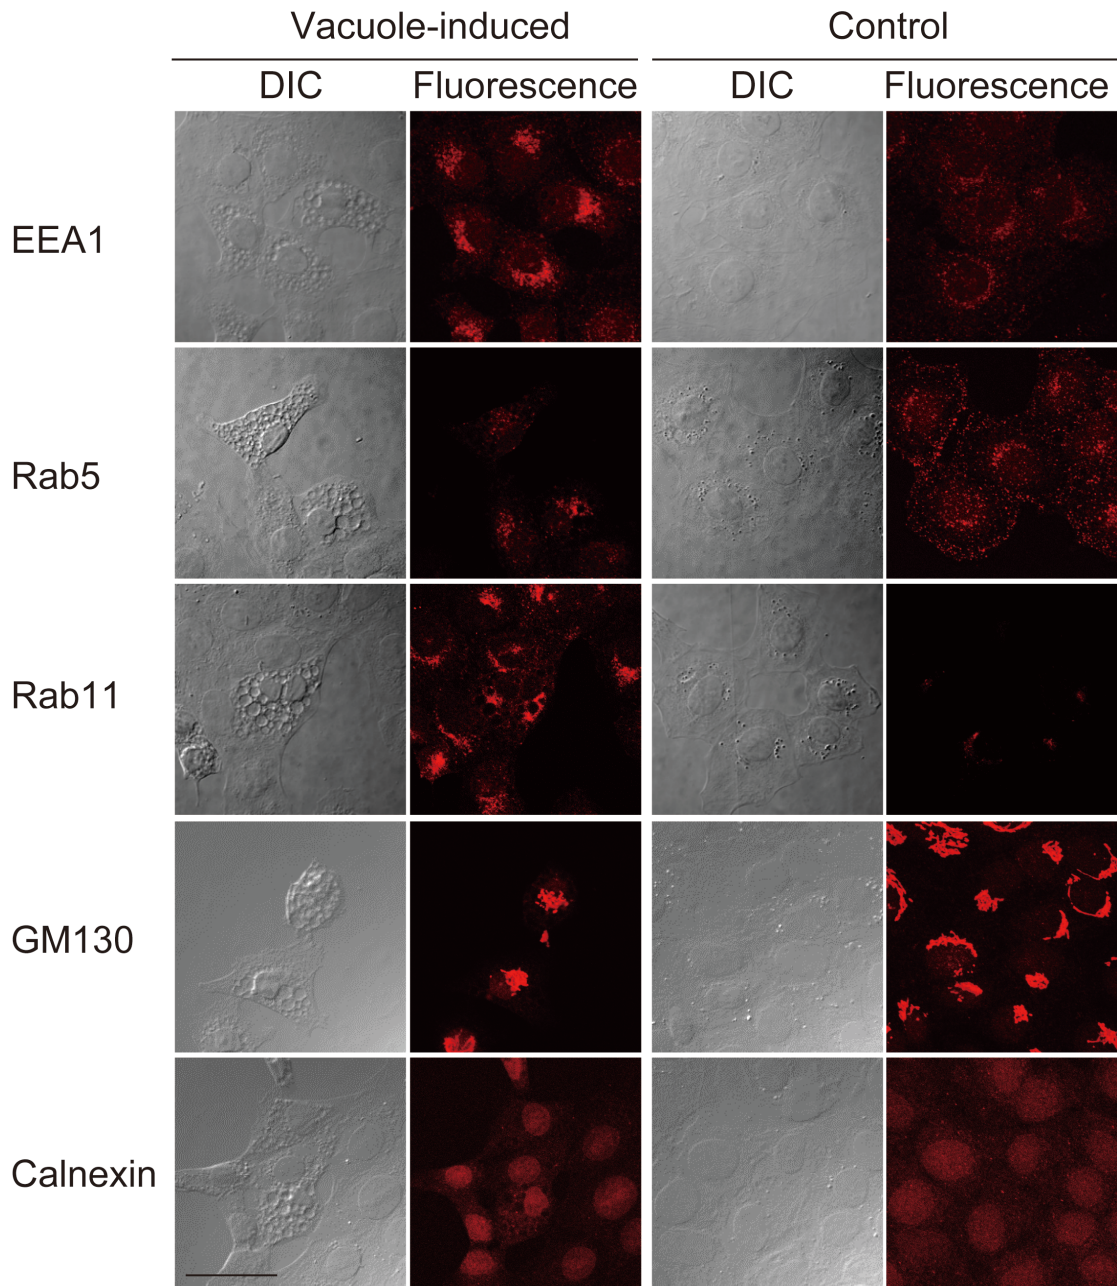

**Figure S2.** “Non-Toxic” complex-induced vacuoles were not co-localised with the early endosome-specific EEA-1 and Rab5, recycling endosome-specific Rab11, Golgi-specific GM130, and endoplasmic reticulum-specific calnexin. The control cells show the localisation of

each protein in the cell without the exposure to “Non-Toxic” complex. Scale bar: 50  $\mu\text{m}$ .

**Movie S1.** Solution structure of the L-TC, resembling a bird spreading its wings, revealed by small-angled X-ray scattering (SAXS). Crystal structure of serotype A BoNT/NTNHA complex (red for BoNT and light green for NTNHA), serotype C HA-70 trimer (yellow), and serotype D HA-33/HA-17 trimer (blue for HA-33 and light blue for HA-17) were docked into the SAXS dummy residual model.
